# Supplementary material for: Solvation of alcohols in ionic liquids – understanding the effect of the anion and cation
Source: Royal Society of Chemistry journal article supplement (doi:10.1039/c7cp07525a), 2017-12-20
Supplement: c7cp07525a1.pdf [file c7cp07525a1.pdf]

# **Solvation of Alcohols in Ionic Liquids – understanding the effect of the Anion and Cation**

*Inês C. M. Vaz,<sup>a</sup> Margarida Bastos,<sup>a</sup> Carlos E. S. Bernardes,<sup>b</sup> J. N. Canongia Lopes<sup>b</sup>  
and Luís M. N. B. F. Santos<sup>a\*</sup>*

<sup>a</sup> Centro de Investigação em Química, Departamento de Química e Bioquímica,  
Faculdade de Ciências da Universidade do Porto, R. Campo Alegre 687, P-4169-007  
Porto, Portugal

<sup>b</sup> Centro de Química Estrutural, Instituto Superior Técnico, Universidade de Lisboa,  
P-1049-001 Lisboa, Portugal

\*Corresponding author

Tel: +351-220402536; E-mail address: [lbsantos@fc.up.pt](mailto:lbsantos@fc.up.pt)

**Table S1.** List of the studied compounds, the CAS number, purity, molar mass, density and water content

| compound                                                             | CAS         | source           | purity | $\frac{\text{molar mass}}{\text{g} \cdot \text{mol}^{-1}}$ | $\frac{\rho}{\text{Kg} \cdot \text{m}^{-3}}$ | $\frac{\text{water}}{\text{ppm}}$ |
|----------------------------------------------------------------------|-------------|------------------|--------|------------------------------------------------------------|----------------------------------------------|-----------------------------------|
| ionic liquids                                                        |             |                  |        |                                                            |                                              |                                   |
| [C <sub>4</sub> py][NTf <sub>2</sub> ]                               | 187863-42-9 | IoLiTec          | 99 %   | 416.36                                                     | –                                            | 60                                |
| [C <sub>4</sub> C <sub>1</sub> pip][NTf <sub>2</sub> ]               | 623580-02-9 | IoLiTec          | 99 %   | 436.44                                                     | 1380.8 <sup>15</sup>                         | 40                                |
| [C <sub>4</sub> C <sub>1</sub> pirr][NTf <sub>2</sub> ]              | 223437-11-4 | IoLiTec          | 99 %   | 422.41                                                     | 1394.9 <sup>16</sup>                         | 48                                |
| [C <sub>4</sub> C <sub>1</sub> pirr][FAP]                            | 851856-47-8 | Merck            | > 99 % | 587.27                                                     | 1583.15 <sup>17</sup>                        | 108                               |
| [C <sub>4</sub> C <sub>1</sub> im][FAP]                              | 917762-91-5 | Merck            | > 99 % | 584.23                                                     | 1625.32 <sup>18</sup>                        | 102                               |
| [C <sub>4</sub> C <sub>1</sub> im][DCA]                              | 448245-52-1 | IoLiTec          | > 98 % | 205.26                                                     | 1060.5 <sup>19</sup>                         | 94                                |
| [C <sub>4</sub> C <sub>1</sub> im][TFA]                              | 174899-94-6 | IoLiTec          | 99 %   | 252.23                                                     | 1212.8 <sup>20</sup>                         | 318                               |
| [C <sub>3</sub> C <sub>1</sub> C <sub>1</sub> im][NTf <sub>2</sub> ] | 169051-76-7 | IoLiTec          | > 98 % | 419.36                                                     | 1456.4 <sup>21</sup>                         | 33                                |
| Alcohol                                                              |             |                  |        |                                                            |                                              |                                   |
| propan-1-ol                                                          | 71-23-8     | Sigma<br>Aldrich | 99.7 % | 60.10                                                      | 799.62 <sup>22</sup>                         | 52                                |

**Table S2.** Results of the quantum chemical calculation of the interaction energy between the propan-1-ol and the anion X in the gas phase.

| X                | Interaction orientation                                                             | $\frac{E_{\text{int}}}{\text{kJ} \cdot \text{mol}^{-1}}$ |
|------------------|-------------------------------------------------------------------------------------|----------------------------------------------------------|
| Anions           |                                                                                     |                                                          |
| TFA              | 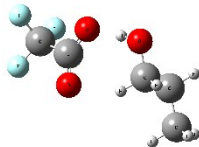   | - 62.90                                                  |
| DCA              |    | - 52.60                                                  |
| PF <sub>6</sub>  |    | - 30.24                                                  |
| NTf <sub>2</sub> |   | - 28.03                                                  |
| FAP              |  | - 17.55                                                  |
| Others           |                                                                                     |                                                          |
| propan-1-ol      |  | - 18.46                                                  |
| propane          |  | - 0.68                                                   |

**Table S3.** Internal configurational energies,  $U_{\text{cfg}}$ , obtained from the molecular dynamic simulations results.

|                                                              | $U_{\text{cfg}} / \text{kJ}\cdot\text{mol}^{-1}$ <sup>a</sup> |
|--------------------------------------------------------------|---------------------------------------------------------------|
| 90 · [C4C1im][TFA] (l)                                       | $-8262.0 \pm 38.9$                                            |
| 90 · [C4C1im][DCA] (l)                                       | $-26735.8 \pm 43.5$                                           |
| 90 · [C4C1im][FAP] (l)                                       | $34356.8 \pm 36.8$                                            |
| 90 · [C4C1im][PF <sub>6</sub> ] (l)                          | $-23373.2 \pm 37.4$                                           |
| 90 · [C4C1im][NTf <sub>2</sub> ] (l)                         | $-4111.2 \pm 41.8$                                            |
| { 90 · [C4C1im][TFA] + 1 · propan-1-ol } (sol)               | $-8291.0 \pm 45.2$                                            |
| { 90 · [C4C1im][DCA] + 1 · propan-1-ol } (sol)               | $-26755.0 \pm 36.2$                                           |
| { 90 · [C4C1im][FAP] + 1 · propan-1-ol } (sol)               | $34360.5 \pm 43.3$                                            |
| { 90 · [C4C1im][PF <sub>6</sub> ] + 1 · propan-1-ol } (sol)  | $-23367.6 \pm 39.5$                                           |
| { 90 · [C4C1im][NTf <sub>2</sub> ] + 1 · propan-1-ol } (sol) | $-4123.7 \pm 40.8$                                            |
| 1 · Propanol (g)                                             | $29.6 \pm 0.4$                                                |

<sup>a</sup> the uncertainties quoted correspond to the standard deviation of 24 values (20 in the case of propanol) obtained in the independent simulation runs.

**Table S4.** Standard ( $p^{\circ}=0.1$  MPa) molar enthalpy of solvation at infinite dilution,  $\Delta_{\text{solv}} H_{\text{m}}^{0,\infty}$ , of propan-1-ol in the studied ionic liquids at 298.15 K, obtained from the data in Table S3.

| Ionic Liquid                | $-\Delta_{\text{solv}} H_{\text{m}}^{0,\infty} / \text{kJ}\cdot\text{mol}^{-1}$ |
|-----------------------------|---------------------------------------------------------------------------------|
| [C4C1im][TFA]               | $61.1 \pm 59.6$                                                                 |
| [C4C1im][DCA]               | $51.3 \pm 56.6$                                                                 |
| [C4C1im][FAP]               | $28.4 \pm 56.8$                                                                 |
| [C4C1im][PF <sub>6</sub> ]  | $26.5 \pm 54.4$                                                                 |
| [C4C1im][NTf <sub>2</sub> ] | $44.6 \pm 58.4$                                                                 |

**Table S5.** Standard ( $p^{\circ}=0.1$  MPa) molar enthalpy of solvation at infinite dilution at 298.15 K,  $\Delta_{\text{solv}}H_m^{0,\infty}$ , for propan-1-ol in  $[C_4C_1\text{im}][\text{TFA}]$ , computed from the 24  $U_{\text{cfg}}(\text{sol})$  and  $U_{\text{cfg}}(\text{IL}, \text{l})$  values found from the independent simulation runs, and  $U_{\text{cfg}}(\text{Prop}, \text{g}) = 29.6 \pm 0.4$  kJ·mol<sup>-1</sup>. All data in kJ·mol<sup>-1</sup>.

| $U_{\text{cfg}}(\text{IL})$ | $U_{\text{cfg}}(\text{sol})$ |         |         |         |         |         |         |         |         |         |         |         |         |         |         |         |         |         |         |         |         |         |         |         |
|-----------------------------|------------------------------|---------|---------|---------|---------|---------|---------|---------|---------|---------|---------|---------|---------|---------|---------|---------|---------|---------|---------|---------|---------|---------|---------|---------|
|                             | -8293.5                      | -8291.1 | -8285.3 | -8402.0 | -8283.9 | -8262.7 | -8279.1 | -8260.9 | -8263.7 | -8262.7 | -8355.1 | -8263.6 | -8324.9 | -8266.3 | -8313.9 | -8234.0 | -8270.7 | -8361.7 | -8269.0 | -8201.5 | -8323.9 | -8249.5 | -8348.9 | -8315.6 |
| -8227.0                     | -98.6                        | -96.2   | -90.4   | -207.1  | -89.0   | -67.8   | -84.2   | -66.0   | -68.8   | -67.8   | -160.2  | -68.7   | -130.0  | -71.4   | -119.0  | -39.1   | -75.8   | -166.8  | -74.1   | -6.6    | -129.0  | -54.6   | -154.0  | -120.7  |
| -8268.9                     | -56.7                        | -54.4   | -48.5   | -165.2  | -47.2   | -25.9   | -42.4   | -24.2   | -26.9   | -25.9   | -118.3  | -26.8   | -88.1   | -29.5   | -77.1   | 2.8     | -33.9   | -124.9  | -32.2   | 35.3    | -87.1   | -12.7   | -112.2  | -78.8   |
| -8291.1                     | -34.4                        | -32.1   | -26.2   | -143.0  | -24.9   | -3.6    | -20.1   | -1.9    | -4.6    | -3.6    | -96.1   | -4.6    | -65.9   | -7.3    | -54.9   | 25.1    | -11.7   | -102.7  | -9.9    | 57.6    | -64.9   | 9.5     | -89.9   | -56.6   |
| -8220.2                     | -105.4                       | -103.1  | -97.2   | -214.0  | -95.9   | -74.6   | -91.1   | -72.9   | -75.6   | -74.6   | -167.0  | -75.5   | -136.8  | -78.2   | -125.9  | -45.9   | -82.7   | -173.6  | -80.9   | -13.4   | -135.8  | -61.5   | -160.9  | -127.5  |
| -8205.8                     | -119.8                       | -117.4  | -111.6  | -228.3  | -110.2  | -89.0   | -105.4  | -87.2   | -89.9   | -88.9   | -181.4  | -89.9   | -151.2  | -92.6   | -140.2  | -60.2   | -97.0   | -188.0  | -95.2   | -27.8   | -150.2  | -75.8   | -175.2  | -141.9  |
| -8235.8                     | -89.8                        | -87.5   | -81.6   | -198.3  | -80.3   | -59.0   | -75.5   | -57.3   | -60.0   | -59.0   | -151.4  | -59.9   | -121.2  | -62.6   | -110.3  | -30.3   | -67.0   | -158.0  | -65.3   | 2.2     | -120.2  | -45.8   | -145.3  | -111.9  |
| -8266.2                     | -59.4                        | -57.0   | -51.2   | -167.9  | -49.8   | -28.6   | -45.0   | -26.8   | -29.6   | -28.5   | -121.0  | -29.5   | -90.8   | -32.2   | -79.8   | 0.1     | -36.6   | -127.6  | -34.9   | 32.6    | -89.8   | -15.4   | -114.8  | -81.5   |
| -8231.9                     | -93.6                        | -91.3   | -85.4   | -202.2  | -84.1   | -62.8   | -79.3   | -61.1   | -63.8   | -62.8   | -155.3  | -63.8   | -125.0  | -66.5   | -114.1  | -34.1   | -70.9   | -161.9  | -69.1   | -1.6    | -124.0  | -49.7   | -149.1  | -115.8  |
| -8255.7                     | -69.8                        | -67.5   | -61.6   | -178.4  | -60.3   | -39.0   | -55.5   | -37.3   | -40.0   | -39.0   | -131.5  | -40.0   | -101.3  | -42.7   | -90.3   | -10.3   | -47.1   | -138.1  | -45.3   | 22.2    | -100.3  | -25.9   | -125.3  | -92.0   |
| -8252.7                     | -72.9                        | -70.5   | -64.7   | -181.4  | -63.3   | -42.1   | -58.5   | -40.3   | -43.1   | -42.0   | -134.5  | -43.0   | -104.3  | -45.7   | -93.3   | -13.4   | -50.1   | -141.1  | -48.3   | 19.1    | -103.3  | -28.9   | -128.3  | -95.0   |
| -8314.2                     | -11.4                        | -9.1    | -3.2    | -119.9  | -1.9    | 19.4    | 2.9     | 21.1    | 18.4    | 19.4    | -73.0   | 18.5    | -42.8   | 15.8    | -31.8   | 48.1    | 11.4    | -79.6   | 13.1    | 80.6    | -41.8   | 32.6    | -66.9   | -33.5   |
| -8225.1                     | -100.5                       | -98.2   | -92.3   | -209.0  | -91.0   | -69.7   | -86.2   | -68.0   | -70.7   | -69.7   | -162.1  | -70.6   | -131.9  | -73.3   | -120.9  | -41.0   | -77.7   | -168.7  | -76.0   | -8.5    | -130.9  | -56.5   | -156.0  | -122.6  |
| -8249.0                     | -76.6                        | -74.3   | -68.4   | -185.2  | -67.1   | -45.8   | -62.3   | -44.1   | -46.8   | -45.8   | -138.2  | -46.7   | -108.0  | -49.4   | -97.1   | -17.1   | -53.9   | -144.8  | -52.1   | 15.4    | -107.0  | -32.6   | -132.1  | -98.7   |
| -8249.8                     | -75.8                        | -73.5   | -67.6   | -184.3  | -66.3   | -45.0   | -61.5   | -43.3   | -46.0   | -45.0   | -137.4  | -45.9   | -107.2  | -48.6   | -96.3   | -16.3   | -53.0   | -144.0  | -51.3   | 16.2    | -106.2  | -31.8   | -131.3  | -97.9   |
| -8293.2                     | -32.4                        | -30.1   | -24.2   | -140.9  | -22.9   | -1.6    | -18.1   | 0.1     | -2.6    | -1.6    | -94.0   | -2.5    | -63.8   | -5.2    | -52.9   | 27.1    | -9.6    | -100.6  | -7.9    | 59.6    | -62.8   | 11.6    | -87.9   | -54.5   |
| -8225.8                     | -99.8                        | -97.4   | -91.6   | -208.3  | -90.2   | -69.0   | -85.4   | -67.2   | -70.0   | -68.9   | -161.4  | -69.9   | -131.2  | -72.6   | -120.2  | -40.3   | -77.0   | -168.0  | -75.2   | -7.8    | -130.2  | -55.8   | -155.2  | -121.9  |
| -8194.8                     | -130.8                       | -128.5  | -122.6  | -239.3  | -121.3  | -100.0  | -116.5  | -98.3   | -101.0  | -100.0  | -192.4  | -100.9  | -162.2  | -103.6  | -151.3  | -71.3   | -108.0  | -199.0  | -106.3  | -38.8   | -161.2  | -86.8   | -186.3  | -152.9  |
| -8274.1                     | -51.5                        | -49.2   | -43.3   | -160.1  | -42.0   | -20.7   | -37.2   | -19.0   | -21.7   | -20.7   | -113.1  | -21.6   | -82.9   | -24.3   | -72.0   | 8.0     | -28.8   | -119.7  | -27.0   | 40.5    | -81.9   | -7.6    | -107.0  | -73.6   |
| -8275.0                     | -50.6                        | -48.2   | -42.4   | -159.1  | -41.0   | -19.8   | -36.2   | -18.0   | -20.8   | -19.8   | -112.2  | -20.7   | -82.0   | -23.4   | -71.0   | 8.9     | -27.8   | -118.8  | -26.1   | 41.4    | -81.0   | -6.6    | -106.0  | -72.7   |
| -8267.6                     | -57.9                        | -55.6   | -49.7   | -166.5  | -48.4   | -27.1   | -43.6   | -25.4   | -28.1   | -27.1   | -119.6  | -28.1   | -89.4   | -30.8   | -78.4   | 1.6     | -35.2   | -126.2  | -33.4   | 34.1    | -88.4   | -14.0   | -113.4  | -80.1   |
| -8285.7                     | -39.9                        | -37.5   | -31.7   | -148.4  | -30.3   | -9.1    | -25.5   | -7.3    | -10.0   | -9.0    | -101.5  | -10.0   | -71.3   | -12.7   | -60.3   | 19.7    | -17.1   | -108.1  | -15.3   | 52.1    | -70.3   | 4.1     | -95.3   | -62.0   |
| -8357.4                     | 31.9                         | 34.2    | 40.1    | -76.7   | 41.4    | 62.7    | 46.2    | 64.4    | 61.7    | 62.7    | -29.8   | 61.8    | 0.5     | 59.0    | 11.4    | 91.4    | 54.6    | -36.4   | 56.4    | 123.9   | 1.5     | 75.8    | -23.6   | 9.8     |
| -8305.4                     | -20.2                        | -17.9   | -12.0   | -128.8  | -10.7   | 10.6    | -5.9    | 12.3    | 9.6     | 10.6    | -81.8   | 9.7     | -51.6   | 7.0     | -40.7   | 39.3    | 2.5     | -88.4   | 4.3     | 71.8    | -50.6   | 23.8    | -75.7   | -42.3   |
| -8316.7                     | -8.9                         | -6.5    | -0.7    | -117.4  | 0.7     | 21.9    | 5.5     | 23.7    | 20.9    | 22.0    | -70.5   | 21.0    | -40.3   | 18.3    | -29.3   | 50.6    | 13.9    | -77.1   | 15.7    | 83.1    | -39.3   | 35.1    | -64.3   | -31.0   |

$$\langle \Delta_{\text{solv}}H_m^{0,\infty} \rangle = -61.1 \pm 58.4 \text{ kJ}\cdot\text{mol}^{-1}; \Delta_{\text{solv}}H_m^{0,\infty} (\text{Max}) = +123.9 \text{ kJ}\cdot\text{mol}^{-1}; \Delta_{\text{solv}}H_m^{0,\infty} (\text{Min}) = -239.3 \text{ kJ}\cdot\text{mol}^{-1}$$

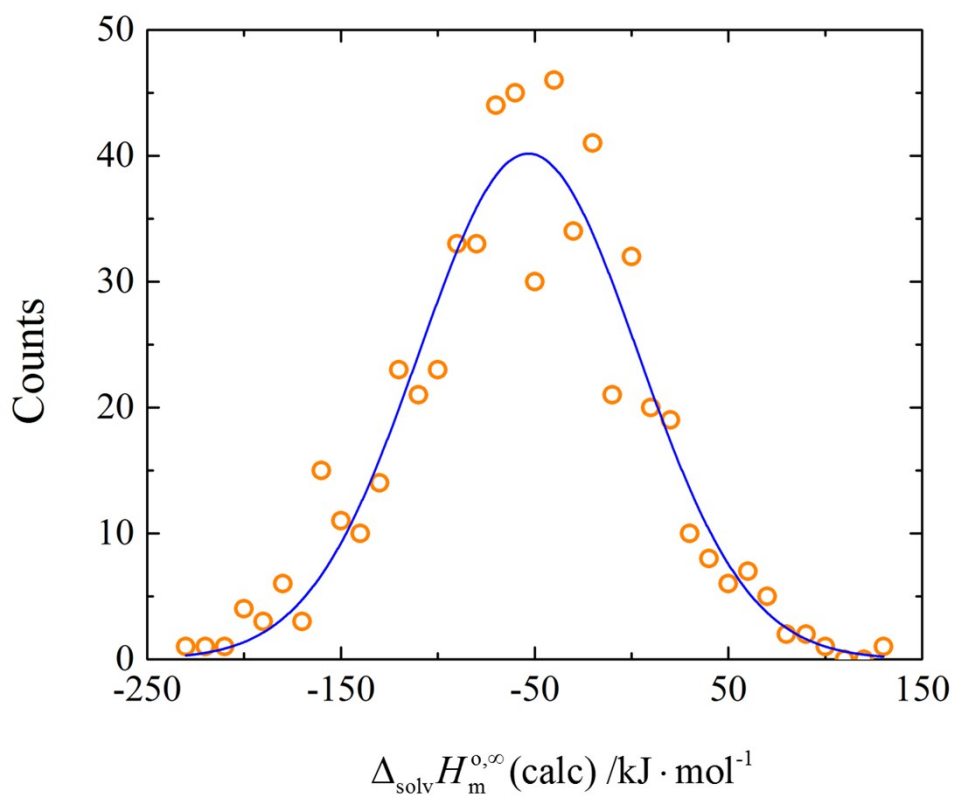

**Figure S1.** Histogram analysis of the  $24 \times 24 = 576$  values of solvation enthalpy of propan-1-ol in [C4C1im][TFA] showing a wide Gaussian distribution centered around  $-60 \text{ kJ} \cdot \text{mol}^{-1}$  and standard deviation intervals of around  $50 \text{ kJ} \cdot \text{mol}^{-1}$ .
